# Supplementary material
Source: ML conference proceedings conference paper supplement (https://proceedings.mlr.press/v119/ballu20a.html)
Supplement: Supplementary file [file ballu20a-supp.pdf]

---

# Stochastic Optimization for Regularized Wasserstein Estimators

---

Marin Ballu   Quentin Berthet   Francis Bach

**This supplementary material contains the proofs of the technical results found in the main text.**

*Proof of proposition 2.1.* This proof follows the reasoning in (Rigollet & Weed, 2018). Let  $\mu = \frac{1}{I} \sum_i \delta_{X_i}$  be the empirical measure of the sample  $(X_i)$ . We first remark that the log-likelihood of  $X_i$  defined by

$$\ell_\nu(X_i) := \log \int \kappa(X_i, y) d\nu(y)$$

verifies

$$\ell_\nu(X_i) = \log \mathbb{E}_{Y \sim \nu} [\kappa(X_i, Y)].$$

With the Legendre transform of the relative entropy, we obtain

$$\ell_\nu(X_i) = \sup_{\gamma_i} \mathbb{E}_{Y \sim \gamma_i} [\log \kappa(X_i, Y)] - \text{KL}(\gamma_i, \nu)$$

with the minimum being over every probability measures  $\gamma_i$  on  $\mathcal{Y}$ . The MLE maximizes

$$\frac{1}{I} \sum_i \ell_\nu(X_i) = \mathbb{E}_{X \sim \mu} [\ell_\nu(X)]$$

over  $\nu \in \mathcal{M}$ , it can be written as

$$\max_{\pi \in \Pi(\mu, \nu)} \mathbb{E}_{(X, Y) \sim \pi} [\log \kappa(X, Y)] - \mathbb{E}_{X \sim \mu} [\text{KL}(\pi(X, \cdot), \nu)],$$

with  $\pi(X, \cdot)$  being the conditional probability of  $\pi$ , defined by  $\pi(X_i, \cdot) := \gamma_i$ . We have

$$\begin{aligned} & \mathbb{E}_{X \sim \mu} [\text{KL}(\pi(X, \cdot), \nu)] \\ &= \frac{1}{I} \sum_i \mathbb{E}_{Y \sim \nu} \left[ \log \frac{d\pi(X_i, \cdot)}{d\nu}(Y) \right], \\ &= \frac{1}{I} \sum_i \mathbb{E}_{Y \sim \nu} \left[ \log \frac{d\pi}{d\mu \otimes \nu}(X_i, Y) \right] - \log I, \\ &= \text{KL}(\pi, \mu \otimes \nu) - \log I. \end{aligned}$$

Thus the MLE minimizes

$$\min_{\pi \in \Pi(\mu, \nu)} \mathbb{E} [c(X, Y)] + \varepsilon \text{KL}(\pi, \mu \otimes \nu),$$

which is the regularized optimal transport cost between  $\mu$  and  $\nu$ .  $\square$

*Proof of the formulas for the gaussian case.* The estimator  $\hat{\nu}$  is a gaussian variable that minimizes

$$\begin{aligned} \text{OT}_\varepsilon(\mu, \nu) + \eta \text{KL}(\nu, \beta) &= \\ & |m_\nu - m_\mu|^2 + \frac{\eta}{2} |m_\nu|^2 \\ &+ \sigma_\mu^2 + \left(1 + \frac{\eta}{2}\right) \sigma_\nu^2 \\ &- \sqrt{4\sigma_\mu^2 \sigma_\nu^2 + \frac{\varepsilon^2}{4}} - \frac{\eta}{2} \log \sigma_\nu^2 \\ &+ \frac{\varepsilon}{2} \log \left( \varepsilon + \sqrt{4\sigma_\mu^2 \sigma_\nu^2 + \frac{\varepsilon^2}{4}} \right). \end{aligned} \quad (1)$$

We write  $\hat{\nu} \sim \mathcal{N}(m_{\hat{\nu}}, \sigma_{\hat{\nu}})$ . The expression of  $m_{\hat{\nu}}$  comes from the minimization of the first two terms of (1), where we take the derivative:

$$2(m_{\hat{\nu}} - m_\mu) - \eta m_{\hat{\nu}} = 0,$$

so

$$m_{\hat{\nu}} = \frac{m_\mu}{1 + \frac{\eta}{2}}.$$

For  $\sigma_{\hat{\nu}}$ , we note

$$\phi(x) = \sqrt{4\sigma_\mu^2 x^2 + \frac{\varepsilon^2}{4}},$$

Noting that we consider the values of  $x = \sigma_\nu$  to be between 1 and  $\sigma_\mu$ , then for  $\varepsilon \rightarrow 0$  we have the Taylor expansions

$$\begin{aligned} \phi(x) &= 2\sigma_\mu x + O(\varepsilon^2), \\ \phi'(x) &= 2\sigma_\mu + O(\varepsilon^2). \end{aligned}$$

The derivative of (1) over  $\sigma_\nu$  gives

$$2 \left(1 + \frac{\eta}{2}\right) \sigma_{\hat{\nu}}^2 - \phi(\sigma_{\hat{\nu}}) - \frac{\eta}{\sigma_{\hat{\nu}}} + \frac{\varepsilon \phi'(\sigma_{\hat{\nu}})}{2(\varepsilon + \phi(\sigma_{\hat{\nu}}))} = 0.$$

We multiply by  $\sigma_{\hat{\nu}}$  and use the Taylor expansions for  $\varepsilon \rightarrow 0$ ,

$$2 \left(1 + \frac{\eta}{2}\right) \sigma_{\hat{\nu}}^2 - 2\sigma_\mu \sigma_{\hat{\nu}} - \eta + \frac{\varepsilon}{2} = O(\varepsilon^2).$$

This second order polynomial in  $\sigma_{\hat{\nu}}$  has two real roots, of the form

$$x = \frac{\sigma_\mu \pm \sqrt{\sigma_\mu^2 + \left(1 + \frac{\eta}{2}\right) (2\eta - \varepsilon)}}{2 + \eta},$$

one of which is negative, so  $\sigma_{\hat{\nu}}$  is converging to the positive one when  $\varepsilon \rightarrow 0$ . Thus we have

$$\sigma_{\hat{\nu}} = \frac{\sigma_{\mu} + \sqrt{\sigma_{\mu}^2 + (1 + \frac{\eta}{2})(2\eta - \varepsilon)}}{2 + \eta} + O(\varepsilon^2).$$

The second expression comes from a Taylor expansion of the square root for  $\eta \rightarrow 0$ .  $\square$

*Proof of Proposition 3.3.* 1. The function  $H_{\beta, \mathcal{M}}^*$  is a Legendre transform, so it is convex, and thus  $-F$  is convex as a sum of convex functions. Moreover  $F$  is bounded from above:

$$\begin{aligned} F(a, b) &\leq C_1 \mathbb{E}[a_i + b_j] - C_2 \mathbb{E}\left[e^{\frac{a_i + b_j}{\varepsilon}}\right], \\ &\leq C_3, \end{aligned}$$

where  $C_3$  does not depend on  $a$  or  $b$ . Thus the set of solutions is nonempty.  $F$  is invariant by the translation  $(a, b) \mapsto (a_1 + c, \dots, a_I + c, b_1 - c, \dots, b_J - c)$ , so each solution generates an affine set of solutions spanned by the vector  $((1, \dots, 1), (-1, \dots, -1))$ . We can conclude using the strong convexity on the slice  $\{\sum_i \mu_i a_i = \sum_j \beta_j b_j\}$ , which implies that there exists only one solution on this slice.

2. The solution  $(a^*, b^*)$  solves the following system

$$\begin{cases} \nabla_a F(a^*, b^*) = 0, \\ \nabla_b F(a^*, b^*) = 0. \end{cases}$$

With notations  $A_i = e^{a_i^*/\varepsilon}$ ,  $B_j = e^{b_j^*/\varepsilon}$ ,  $\Gamma_{i,j} = e^{-C_{i,j}/\varepsilon}$ , the two equations can be written as

$$\begin{cases} \forall 1 \leq i \leq I, & 1 - A_i \sum_j \beta_j B_j \Gamma_{i,j} = 0, \\ \forall 1 \leq j \leq J, & f_j - B_j \sum_i \mu_i A_i \Gamma_{i,j} = 0. \end{cases} \quad (2)$$

Thus

$$\begin{cases} \forall 1 \leq i \leq I, & A_i = \frac{1}{\sum_j \beta_j B_j \Gamma_{i,j}}, \\ \forall 1 \leq j \leq J, & B_j = \frac{f_j}{\sum_i \mu_i A_i \Gamma_{i,j}}. \end{cases} \quad (3)$$

We also remark that by multiplying the second term of (2) by  $\beta_j$  and summing over  $j$  we get

$$\sum_{i,j} \mu_i A_i \beta_j B_j \Gamma_{i,j} = 1. \quad (4)$$

By multiplying the equations in (3) we have for all  $i, j$ :

$$A_i B_j \Gamma_{i,j} = \frac{f_j \Gamma_{i,j}}{\sum_{k,l} \mu_k A_k \Gamma_{k,j} \beta_l B_l \Gamma_{i,l}}$$

thus using (4):

$$f_j \min_{k,l} \frac{\Gamma_{i,j} \Gamma_{k,l}}{\Gamma_{k,j} \Gamma_{i,l}} \leq A_i B_j \Gamma_{i,j} \leq f_j \max_{k,l} \frac{\Gamma_{i,j} \Gamma_{k,l}}{\Gamma_{k,j} \Gamma_{i,l}},$$

finally

$$e^{-m-2R_C/\varepsilon} \leq A_i B_j \Gamma_{i,j} \leq e^{m+2R_C/\varepsilon}.$$

3. We now prove that  $-F$  is strongly convex. We compute

$$\begin{aligned} -\nabla_a^2 F &= \mathbb{E}\left[\frac{1}{\varepsilon} D_{i,j} E_{i,i}\right], \\ -\nabla_b^2 F &= -\nabla_b \nu^* + \mathbb{E}\left[\frac{1}{\varepsilon} D_{i,j} E_{j,j}\right], \\ -\nabla_a \nabla_b F &= \mathbb{E}\left[\frac{1}{\varepsilon} D_{i,j} E_{i,j}\right]. \end{aligned}$$

We remark that

$$\nu^* = \text{softmax}(-b_j/\eta + \log \beta_j),$$

so

$$-\nabla_b \nu^* = \frac{1}{\eta} S$$

with

$$\begin{aligned} S &:= (\nabla \text{softmax})(-b_j/\eta + \log \beta_j), \\ S &= (\nu_i (\delta_{i,j} - \nu_j))_{i,j}. \end{aligned}$$

We remark that  $S \succcurlyeq 0$  since

$$\begin{aligned} u^T S u &= \sum_i \nu_i u_i^2 - \left(\sum_i \nu_i u_i\right)^2 \\ &= \mathbb{E}_{\nu}[U^2] - (\mathbb{E}_{\nu}[U])^2 \geq 0 \end{aligned}$$

by Jensen, with  $U = u_j$  with probability  $\nu_j$ . It implies  $-\nabla_b \nu_j^* \succcurlyeq 0$ . So

$$-\nabla_{a,b}^2 F \succcurlyeq \frac{1}{\varepsilon} M,$$

with

$$M := \mathbb{E}\left[D_{i,j} \begin{pmatrix} E_{i,i} & E_{i,j} \\ E_{j,i} & E_{j,j} \end{pmatrix}\right].$$

As we want to prove strong convexity on the slice  $\sum_i \mu_i a_i = \sum_j \beta_j b_j$ , we compute

$$\begin{aligned} (a, b)^T M(a, b) &= \mathbb{E}[D_{i,j}(a_i + b_j)^2] \\ &\geq e^{-B/\varepsilon} \mathbb{E}[(a_i + b_j)^2]. \end{aligned}$$

We add that

$$\begin{aligned} \mathbb{E}[(a_i + b_j)^2] &= \\ &= \sum_i \mu_i a_i^2 + \sum_j \beta_j b_j^2 + 2\left(\sum_i \mu_i a_i\right)\left(\sum_j \beta_j b_j\right) \end{aligned}$$

thus

$$\mathbb{E}[(a_i + b_j)^2] = \sum_i (\mu_i + \mu_i^2) a_i^2 + \sum_j (\beta_j + \beta_j^2) b_j^2$$

since we are on the slice. So  $M \succcurlyeq \lambda \text{Id}$  and finally  $-F$  is  $\lambda$ -strongly convex with

$$\lambda = \frac{\min_{i,j} \{\mu_i, \beta_j\}}{\varepsilon} e^{-B/\varepsilon}.$$

4. We compute the gradients of  $F$ :

$$\begin{aligned}\frac{\partial F}{\partial a_i}(a, b) &= \mu_i - \mu_i \sum_{j=1}^J \beta_j D_{i,j}(a, b), \\ \frac{\partial F}{\partial b_j}(a, b) &= \nu_j^*(-b/\eta) - \beta_j \sum_{i=1}^I \mu_i D_{i,j}(a, b),\end{aligned}$$

with  $D_{i,j}(a, b) = e^{\frac{a_i + b_j - c_{i,j}}{\varepsilon}}$ . If we take  $i$  and  $j$  to be independent random variables following the laws  $(\mu_i)$  and  $(\beta_j)$  respectively, we have the desired expression for the gradients.  $\square$

*Proof of Lemma 1.* With the initial conditions, we guarantee that  $0 \leq G_a^0 \leq 1$  and  $0 \leq G_b^0 \leq f_j \leq e^m$ . At each timestep  $t$ , we have

$$\|\nabla F_{i,j}^t\|^2 \leq \max\{2e^{2m}, 2(D_{i,j}^t)^2\},$$

with  $i, j$  being two independent random variables following the laws  $\mu$  and  $\beta$  respectively. If  $D_{i,j}^t \geq e^m$ , then  $G_a + G_b \leq 0$  and

$$D_{i,j}^{t+1} = D_{i,j}^t e^{\frac{G_a + G_b}{\varepsilon}} \leq D_{i,j}^t.$$

Moreover if  $D_{i,j}^t \leq e^m$  then  $\|\nabla F_{i,j}^t\|^2 \leq 1 + e^{2m}$  thus  $\mathbb{E}[\max\{2e^{2m}, (D_{i,j}^t)^2\}]$  is a decreasing function of  $t$ . Thus we have the bound

$$\mathbb{E}[\|\nabla_a F_{i,j}(a^t, b^t)\|^2 + \|\nabla_b F_{i,j}(a^t, b^t)\|^2] \leq 2e^{2m}.$$

$\square$

*Proof of Lemma 2.* We first assume that  $(a, b)$  and  $(a^*, b^*)$  are on the slice  $\{\sum_i \mu_i a_i = \sum_j \beta_j b_j\}$ . By strong convexity of  $-F$  on this slice we have

$$|b - b^*|^2 \leq \frac{2(F(a^*, b^*) - F(a, b))}{\lambda}. \quad (5)$$

We remark that the function  $g : b \mapsto KL(\nu(b^*), \nu(b))$  verifies

$$\begin{aligned}\partial_i g(b) &= - \sum_j \nu_j(b^*) \partial_i \log \nu_j(b), \\ &= - \sum_j \nu_j(b^*) \nu_j(b)^{-1} \partial_i \nu_j(b), \\ &= \frac{1}{\eta} \sum_j \nu_j(b^*) \nu_j(b)^{-1} \nu_i(\delta_{ij} - \nu_j(b)), \\ &= \frac{\nu_i(b^*) - \nu_i(b)}{\eta - \varepsilon},\end{aligned}$$

thus

$$\begin{aligned}\partial_i \partial_j g(b) &= - \frac{\partial_j \nu_i(b)}{\eta - \varepsilon}, \\ &= - \frac{\nu_j(b)(\delta_{ij} - \nu_i(b))}{\eta - \varepsilon},\end{aligned}$$

so the Hessian matrix  $\nabla^2 g(b)$  of  $g$  is a sum of a diagonal matrix with the negative values  $-\nu_j(b)/(\eta - \varepsilon)$  and the one-rank matrix  $(\nu_j(b)\nu_i(b)/(\eta - \varepsilon))_{i,j}$ . Hence the eigenvalues of  $\nabla^2 g(b)$  are contained in  $[-1/(\eta - \varepsilon), 1/(\eta - \varepsilon)]$ , thus Taylor's inequality gives

$$\begin{aligned}g(b) &\leq g(b^*) + |b - b^*| \|\nabla g(b^*)\| + \frac{|b - b^*|^2}{2(\eta - \varepsilon)}, \\ &\leq \frac{|b - b^*|^2}{2(\eta - \varepsilon)},\end{aligned}$$

because  $g(b^*) = 0$  and  $\nabla g(b^*) = 0$ . We complete the proof with (5). For the case where the vector  $(a, b)$  or  $(a^*, b^*)$  is not on the slice  $\{\sum_i \mu_i a_i = \sum_j \beta_j b_j\}$ , we note that adding a constant vector  $c = (c_1, \dots, c_1)$  to  $b$  does not change the value of  $\nu(b)$ , and that  $F$  is invariant by translation in the direction  $(-c, +c)$ . With  $c_1 = (\sum_i \mu_i a_i - \sum_j \beta_j b_j)/2$ , the vectors  $(a', b') = (a + c, b - c)$  are on the slice and verify  $\nu(b') = \nu(b)$  and  $F(a', b') = F(a, b)$ . Hence the result for  $(a', b')$  implies the result for  $(a, b)$ .  $\square$

## References

Rigollet, P. and Weed, J. Entropic optimal transport is maximum-likelihood deconvolution. *Comptes Rendus Mathematique*, 356(11-12):1228–1235, 2018.
